# Supplementary material for: Effect of Zwitterionic Additives on Solvation and Transport of Sodium and Potassium Cations in (Ethylene Oxide)10: A Molecular Dynamics Simulation Study
Source: MDPI journal article supplement (doi:10.3390/nano14020219), 2024-01-19
Supplement: s1 [file s1]

## Supplementary materials

### Effect of Zwitterionic Additives on Solvation and Transport of Sodium and Potassium Cations in (Ethylene Oxide)<sub>10</sub>: a Molecular Dynamics Simulation Study

Manh Tien Nguyen<sup>1,2\*</sup>, Yuhua Duan<sup>2</sup>, Qing Shao<sup>1\*</sup>

<sup>1</sup> Chemical and Materials Engineering Department, University of Kentucky, Lexington, KY 40506, USA

<sup>2</sup> National Energy Technology laboratory, United States Department of Energy, Pittsburgh, PA 15236, USA

#### List of tables:

|                                                                                                                         |   |
|-------------------------------------------------------------------------------------------------------------------------|---|
| Table S1. Force field parameters. Labels as shown in Figure 1. ....                                                     | 2 |
| Table S2. Diffusion coefficient of Na <sup>+</sup> /K <sup>+</sup> at 600K (nm <sup>2</sup> /ns).....                   | 6 |
| Table S3. Diffusion coefficient of [TFSI] <sup>-</sup> at 600K (nm <sup>2</sup> /ns).....                               | 7 |
| Table S4. Diffusion coefficients of ZW at 600K (nm <sup>2</sup> /ns).....                                               | 7 |
| Table S5. Coordination numbers of Na <sup>+</sup> -O in systems at 353K .....                                           | 9 |
| Table S6. Coordination numbers of K <sup>+</sup> -O in systems at 353K .....                                            | 9 |
| Table S7. Diffusion coefficient of Na <sup>+</sup> /K <sup>+</sup> at 353K (10 <sup>-4</sup> nm <sup>2</sup> /ns) ..... | 9 |

#### List of figures:

|                                                                                                                                                                                                                                                                                                                                                                                                                                                                                                                                       |   |
|---------------------------------------------------------------------------------------------------------------------------------------------------------------------------------------------------------------------------------------------------------------------------------------------------------------------------------------------------------------------------------------------------------------------------------------------------------------------------------------------------------------------------------------|---|
| Figure S1. Molecular structures of (a) ChoPO4, (b) ImSO3, (c) ImCO2, (d) [TFSI] <sup>-</sup> , and (e) EO <sub>10</sub> . Every atom is labeled with a unique name. Atom color code: hydrogen (silver), carbon (cyan), nitrogen (blue), oxygen (red), sulfur (yellow). ....                                                                                                                                                                                                                                                           | 4 |
| Figure S2. Radial distribution functions of Na <sup>+</sup> /K <sup>+</sup> -O(ZW) at 600K. Atom names are the same as in Figure 1. K <sup>+</sup> prefers to coordinate with two O atoms (O45) having double bonds with P atom on PO <sub>4</sub> group of ChoPO4.....                                                                                                                                                                                                                                                               | 5 |
| Figure S3. Snapshot of (a) 4 ChoPO4 coordinating with 4 Na <sup>+</sup> , (b) 4 ImCO2 coordinating with 5 Na <sup>+</sup> , and (c) 1 ImSO3 coordinating with 3 Na <sup>+</sup> in Na <sup>+</sup> system. Na <sup>+</sup> ions are represented using the VDW model with yellow colour; ZW molecules are displayed with the CPK model; [TFSI] <sup>-</sup> and EO <sub>10</sub> molecules are displayed using the line model. Atom color code: hydrogen (silver), carbon (cyan), nitrogen (blue), oxygen (red), sulfur (yellow). .... | 5 |
| Figure S4. Snapshot of (a) 4 ChoPO4 coordinating with 4 K <sup>+</sup> , (b) 4 ImCO2 coordinating with 5 K <sup>+</sup> , and (c) 1 ImSO3 coordinating with 3 K <sup>+</sup> in K <sup>+</sup> system. K <sup>+</sup> ions are represented using the VDW model with ochre colour; ZW molecules are displayed with the CPK model; [TFSI] <sup>-</sup> and EO <sub>10</sub> molecules are displayed using the line model. Atom color code: hydrogen (silver), carbon (cyan), nitrogen (blue), oxygen (red), sulfur (yellow). ....       | 5 |
| Figure S5. Residence C(t) curves of (a) Na <sup>+</sup> -O([TFSI] <sup>-</sup> ) in, (b) Na <sup>+</sup> -O(EO <sub>10</sub> ) and (c) Na <sup>+</sup> -O(ZW) in NaTFSI/EO <sub>10</sub> systems at 600K. ....                                                                                                                                                                                                                                                                                                                        | 6 |
| Figure S6. Residence C(t) curves of (a) K <sup>+</sup> -O([TFSI] <sup>-</sup> ) in, (b) K <sup>+</sup> -O(EO <sub>10</sub> ) and (c) K <sup>+</sup> -O(ZW) in NaTFSI/EO <sub>10</sub> systems at 600K. ....                                                                                                                                                                                                                                                                                                                           | 6 |
| Figure S7. MSD curves of (a) Na <sup>+</sup> , (b) [TFSI] <sup>-</sup> and (c) ZW in NaTFSI/EO <sub>10</sub> systems at 600K. ...                                                                                                                                                                                                                                                                                                                                                                                                     | 6 |
| Figure S8. MSD curves of (a) K <sup>+</sup> , (b) [TFSI] <sup>-</sup> and (c) ZW in KTFSI/EO <sub>10</sub> systems at 600K. ....                                                                                                                                                                                                                                                                                                                                                                                                      | 6 |

|                                                                                                                                                                                                                                                                                                                                                                             |    |
|-----------------------------------------------------------------------------------------------------------------------------------------------------------------------------------------------------------------------------------------------------------------------------------------------------------------------------------------------------------------------------|----|
| Figure S9. Distance travelled by Na <sup>+</sup> ions in a specific O coordination number over 2-ns for systems (a) with ChoPO4, (b) with ImCO2, and (c) with ImSO3.....                                                                                                                                                                                                    | 7  |
| Figure S10. Distance travelled by K <sup>+</sup> ions in a specific O coordination number over 2-ns for systems (a) with ChoPO4, (b) with ImCO2, and (c) with ImSO3.....                                                                                                                                                                                                    | 7  |
| Figure S11. Radial distribution functions of (a) Na <sup>+</sup> / K <sup>+</sup> -O([TFSI] <sup>-</sup> ), (b) Na <sup>+</sup> / K <sup>+</sup> -O(EO <sub>10</sub> ), (c) Na <sup>+</sup> / K <sup>+</sup> -O(ZW) and (d) Na <sup>+</sup> - Na <sup>+</sup> and K <sup>+</sup> -K <sup>+</sup> in NaTFSI/EO <sub>10</sub> and KTFSI/EO <sub>10</sub> systems at 353K..... | 8  |
| Figure S12. Radial distribution functions of cation-ZW in NaTFSI/EO <sub>10</sub> and KTFSI/EO <sub>10</sub> systems at 353K. ....                                                                                                                                                                                                                                          | 9  |
| Figure S13. Residence C(t) curves of (a) Na <sup>+</sup> -O([TFSI] <sup>-</sup> ) in, (b) Na <sup>+</sup> -O(EO <sub>10</sub> ) and (c) Na <sup>+</sup> -O(ZW) in c systems at 353K. Colors correspond to the presence of ZW molecules. ....                                                                                                                                | 9  |
| Figure S14. Residence C(t) curves of (a) K <sup>+</sup> -O([TFSI] <sup>-</sup> ) in, (b) K <sup>+</sup> -O(EO <sub>10</sub> ) and (c) K <sup>+</sup> -O(ZW) in c systems at 353K. Colors correspond to the presence of ZW molecules. ....                                                                                                                                   | 9  |
| Figure S15. Percentage of cations that are not coordinating with EO <sub>10</sub> at 353K.....                                                                                                                                                                                                                                                                              | 10 |
| Figure S16. Rg distribution in (a) Li <sup>+</sup> , (b) Na <sup>+</sup> , (c) K <sup>+</sup> systems.....                                                                                                                                                                                                                                                                  | 10 |

Table S1. Force field parameters. Labels as shown in Figure S1.

| Label             | $\sigma$ (nm) | $\epsilon$ (kJ/mol) | q (e)   |
|-------------------|---------------|---------------------|---------|
| ChoPO4            |               |                     |         |
| C1                | 0.355         | 0.317984            | -0.1723 |
| C2                | 0.355         | 0.317984            | -0.1605 |
| C3                | 0.35          | 0.276144            | -0.2016 |
| C4                | 0.355         | 0.29288             | 0.4866  |
| C5                | 0.35          | 0.276144            | -0.0058 |
| C6                | 0.35          | 0.276144            | 0.0849  |
| C7                | 0.35          | 0.276144            | -0.002  |
| C8                | 0.35          | 0.276144            | -0.0943 |
| C9                | 0.35          | 0.276144            | -0.1506 |
| CX                | 0.35          | 0.276144            | -0.1822 |
| CY                | 0.35          | 0.276144            | -0.1863 |
| H11, and H12      | 0.25          | 0.12552             | 0.1428  |
| H31, H32, and H33 | 0.25          | 0.12552             | 0.0983  |
| H51, and H52      | 0.25          | 0.12552             | 0.1025  |
| H61, and H62      | 0.25          | 0.12552             | 0.0971  |
| H71, and H72      | 0.25          | 0.12552             | 0.0811  |
| H81, and H82      | 0.25          | 0.12552             | 0.1306  |
| H91, H92, and H93 | 0.25          | 0.12552             | 0.1608  |
| HX1, HX2, and HX3 | 0.25          | 0.12552             | 0.1519  |
| HY1, HY2, and HY3 | 0.25          | 0.12552             | 0.139   |
| N                 | 0.325         | 0.71128             | -0.0123 |
| O1                | 0.296         | 0.87864             | -0.4613 |
| O2                | 0.29          | 0.58576             | -0.3565 |
| O3                | 0.29          | 0.58576             | -0.9069 |
| O4, and O5        | 0.296         | 0.87864             | -1.1686 |
| O6                | 0.29          | 0.58576             | -0.8125 |

|                     |       |          |         |
|---------------------|-------|----------|---------|
| P                   | 0.374 | 0.8368   | 2.7126  |
| ImCO <sub>2</sub>   |       |          |         |
| C                   | 0.355 | 0.29288  | 0.486   |
| C1                  | 0.35  | 0.276144 | -0.276  |
| C2                  | 0.35  | 0.276144 | 0.023   |
| C3                  | 0.355 | 0.29288  | 0.198   |
| C4                  | 0.355 | 0.29288  | -0.074  |
| C5                  | 0.355 | 0.29288  | -0.077  |
| C6                  | 0.35  | 0.276144 | 0.002   |
| C7                  | 0.35  | 0.276144 | -0.171  |
| C8                  | 0.35  | 0.276144 | -0.29   |
| H11, H12, and H13   | 0.25  | 0.12552  | 0.119   |
| H21, and H22        | 0.25  | 0.12552  | 0.135   |
| H3                  | 0.242 | 0.12552  | 0.347   |
| H4                  | 0.242 | 0.12552  | 0.234   |
| H5                  | 0.242 | 0.12552  | 0.242   |
| H61, and H62        | 0.25  | 0.12552  | 0.145   |
| H71, and H72        | 0.25  | 0.12552  | 0.107   |
| H81, and H82        | 0.25  | 0.12552  | 0.088   |
| N1                  | 0.325 | 0.71128  | -0.324  |
| N2                  | 0.325 | 0.71128  | -0.213  |
| O1, and O2          | 0.296 | 0.87864  | -0.707  |
| ImSO <sub>3</sub>   |       |          |         |
| C1                  | 0.35  | 0.276144 | -0.2595 |
| C2                  | 0.35  | 0.276144 | -0.0352 |
| C3                  | 0.355 | 0.29288  | 0.0914  |
| C4                  | 0.355 | 0.29288  | -0.1274 |
| C5                  | 0.355 | 0.29288  | -0.08   |
| C6                  | 0.35  | 0.276144 | -0.066  |
| C7                  | 0.35  | 0.276144 | -0.133  |
| C8                  | 0.35  | 0.276144 | -0.6807 |
| H11, H12, and H13   | 0.25  | 0.12552  | 0.1196  |
| H21, and H22        | 0.25  | 0.12552  | 0.1324  |
| H3                  | 0.242 | 0.12552  | 0.2719  |
| H4                  | 0.242 | 0.12552  | 0.25    |
| H5                  | 0.242 | 0.12552  | 0.2744  |
| H61, and H62        | 0.25  | 0.12552  | 0.1318  |
| H71, and H72        | 0.25  | 0.12552  | 0.1279  |
| H81, and H82        | 0.25  | 0.12552  | 0.1329  |
| N1                  | 0.325 | 0.71128  | -0.1837 |
| N2                  | 0.325 | 0.71128  | -0.087  |
| O1, O2, and O3      | 0.296 | 0.71128  | -0.7122 |
| S                   | 0.355 | 1.046    | 1.4926  |
| [TFSI] <sup>-</sup> |       |          |         |
| N                   | 0.325 | 0.71128  | -0.66   |

|                       |       |          |       |
|-----------------------|-------|----------|-------|
| S1 and S2             | 0.355 | 1.046    | 1.02  |
| O11, O12, O21 and O22 | 0.296 | 0.87864  | -0.53 |
| C1 and C2             | 0.35  | 0.27614  | 0.35  |
| F11, F12 and F13      | 0.295 | 0.22175  | -0.16 |
| F21, F22 and F23      | 0.295 | 0.22175  | -0.16 |
| EO <sub>10</sub>      |       |          |       |
| C1, and C20           | 0.35  | 0.276144 | 0.11  |
| H1-3, and H40-42      | 0.25  | 0.12552  | 0.03  |
| O1-10                 | 0.29  | 0.58576  | -0.4  |
| C2-19                 | 0.35  | 0.276144 | 0.14  |
| H4-39                 | 0.25  | 0.12552  | 0.03  |

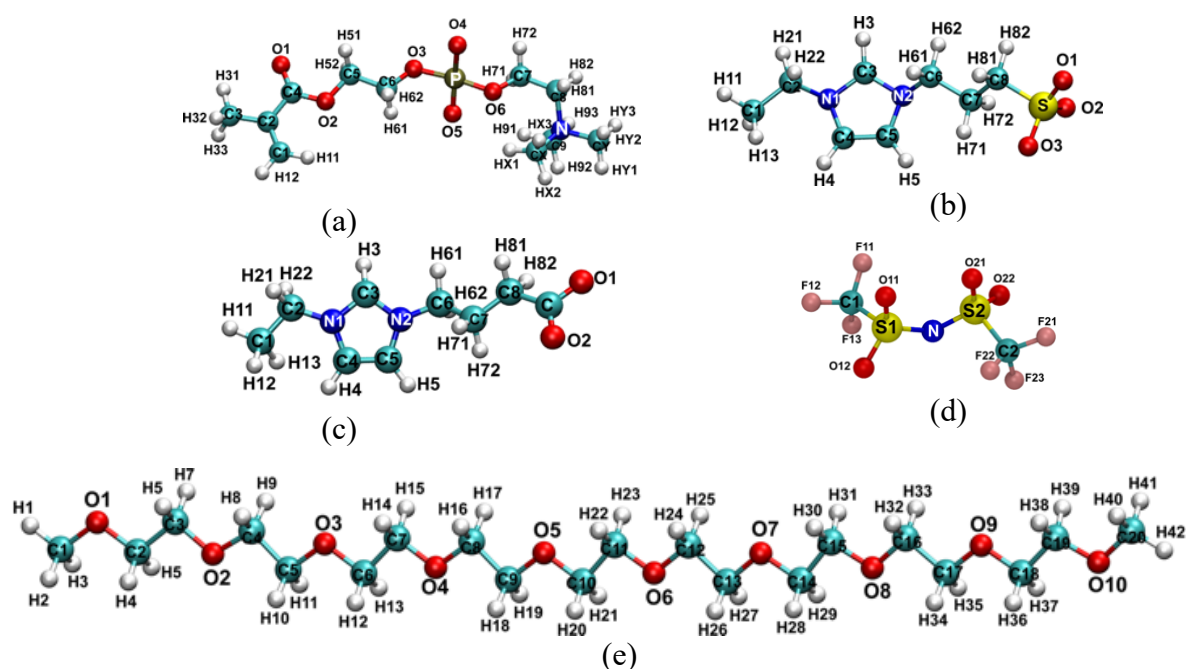

Figure S1. Molecular structures of (a) ChoPO<sub>4</sub>, (b) ImSO<sub>3</sub>, (c) ImCO<sub>2</sub>, (d) [TFSI]<sup>-</sup>, and (e) EO<sub>10</sub>. Every atom is labeled with a unique name. Atom color code: hydrogen (silver), carbon (cyan), nitrogen (blue), oxygen (red), sulfur (yellow).

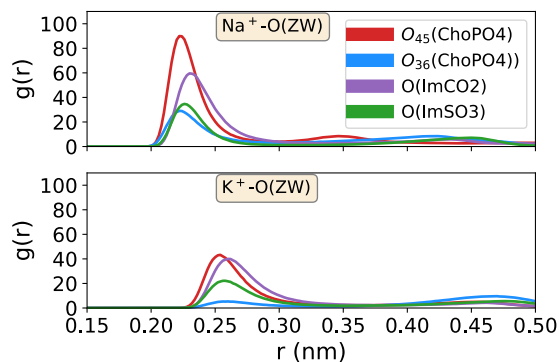

Figure S2. Radial distribution functions of  $\text{Na}^+/\text{K}^+-\text{O}(\text{ZW})$  at 600K. Atom names are the same as in Figure 1.  $\text{K}^+$  prefers to coordinate with two O atoms (O45) having double bonds with P atom on  $\text{PO}_4$  group of ChoPO4.

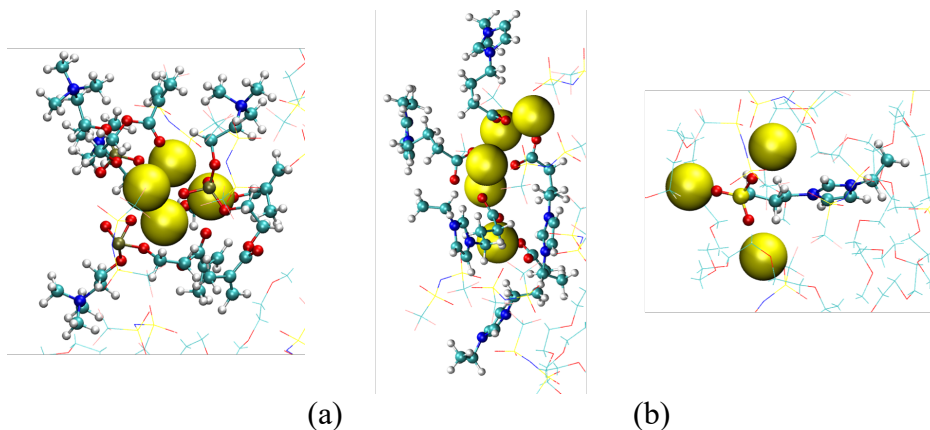

Figure S3. Snapshot of (a) 4 ChoPO4 coordinating with 4  $\text{Na}^+$ , (b) 4 ImCO2 coordinating with 5  $\text{Na}^+$ , and (c) 1 ImSO3 coordinating with 3  $\text{Na}^+$  in  $\text{Na}^+$  system.  $\text{Na}^+$  ions are represented using the VDW model with yellow colour; ZW molecules are displayed with the CPK model;  $[\text{TFSI}]^-$  and  $\text{EO}_{10}$  molecules are displayed using the line model. Atom color code: hydrogen (silver), carbon (cyan), nitrogen (blue), oxygen (red), sulfur (yellow).

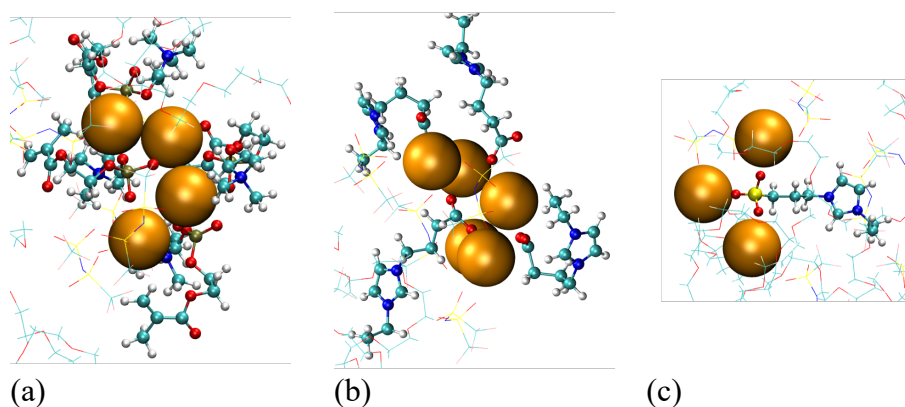

Figure S4. Snapshot of (a) 4 ChoPO4 coordinating with 4  $\text{K}^+$ , (b) 4 ImCO2 coordinating with 5  $\text{K}^+$ , and (c) 1 ImSO3 coordinating with 3  $\text{K}^+$  in  $\text{K}^+$  system.  $\text{K}^+$  ions are represented using the VDW model with ochre colour; ZW molecules are displayed with the CPK model;  $[\text{TFSI}]^-$  and  $\text{EO}_{10}$  molecules are displayed using the line model. Atom color code: hydrogen (silver), carbon (cyan), nitrogen (blue), oxygen (red), sulfur (yellow).

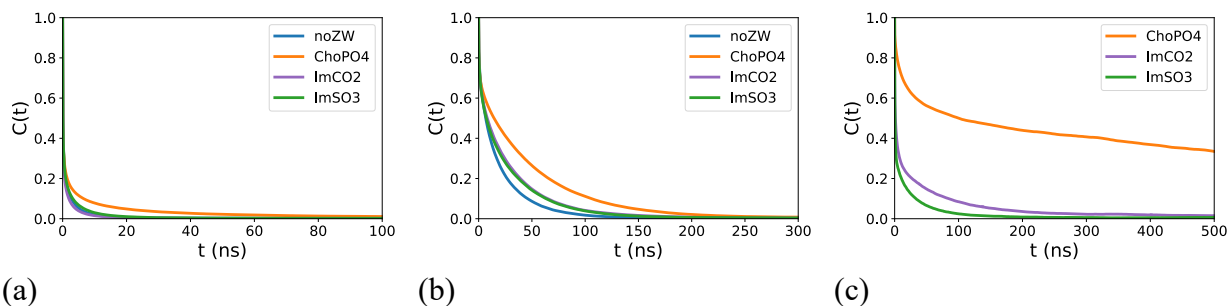

Figure S5. Residence  $C(t)$  curves of (a)  $\text{Na}^+-\text{O}([\text{TFSI}]^-)$  in, (b)  $\text{Na}^+-\text{O}(\text{EO}_{10})$  and (c)  $\text{Na}^+-\text{O}(\text{ZW})$  in  $\text{NaTFSI}/\text{EO}_{10}$  systems at 600K.

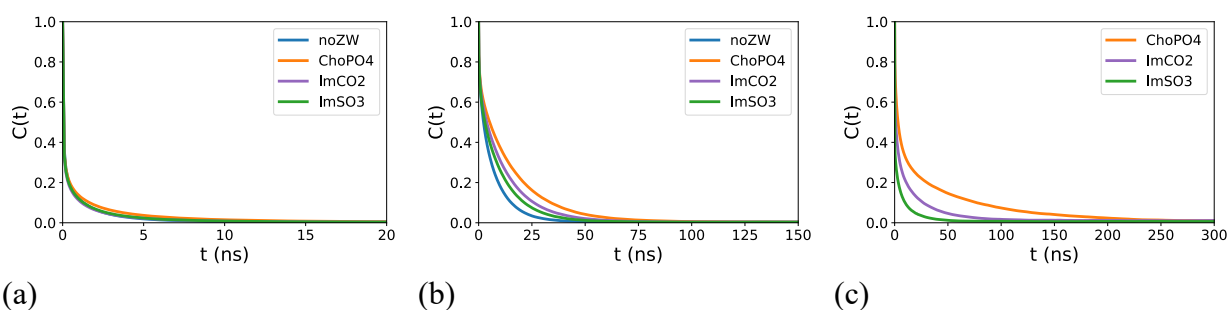

Figure S6. Residence  $C(t)$  curves of (a)  $\text{K}^+-\text{O}([\text{TFSI}]^-)$  in, (b)  $\text{K}^+-\text{O}(\text{EO}_{10})$  and (c)  $\text{K}^+-\text{O}(\text{ZW})$  in  $\text{NaTFSI}/\text{EO}_{10}$  systems at 600K.

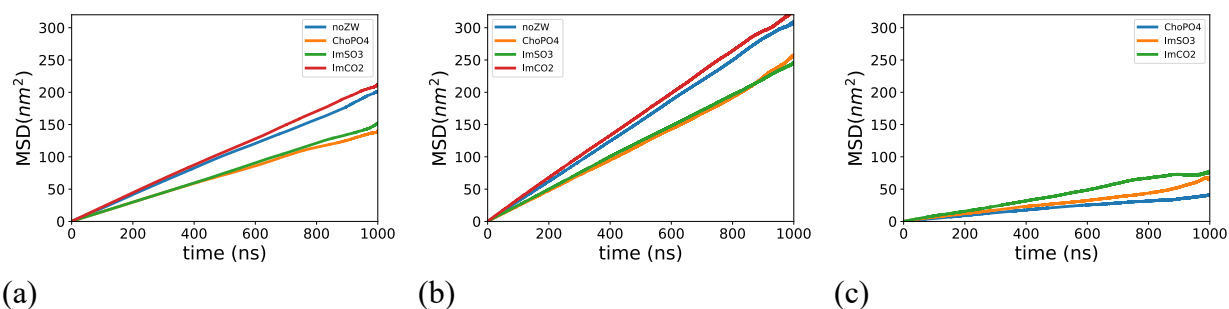

Figure S7. MSD curves of (a)  $\text{Na}^+$ , (b)  $[\text{TFSI}]^-$  and (c) ZW in  $\text{NaTFSI}/\text{EO}_{10}$  systems at 600K.

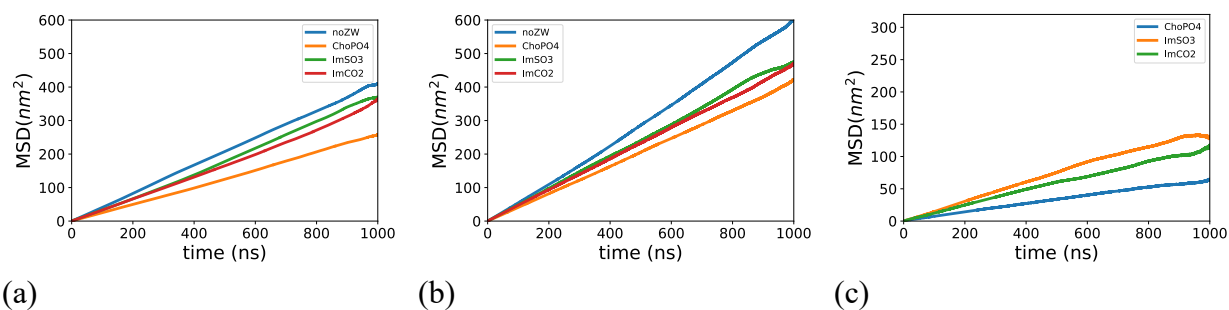

Figure S8. MSD curves of (a)  $\text{K}^+$ , (b)  $[\text{TFSI}]^-$  and (c) ZW in  $\text{KTFSI}/\text{EO}_{10}$  systems at 600K.

Table S2. Diffusion coefficient of Na<sup>+</sup>/K<sup>+</sup> at 600K (nm<sup>2</sup>/ns)

| System          | noZW          | ChoPO4        | ImCO2         | ImSO3         |
|-----------------|---------------|---------------|---------------|---------------|
| Na <sup>+</sup> | 0.030 ± 0.003 | 0.028 ± 0.003 | 0.036 ± 0.001 | 0.027 ± 0.001 |
| K <sup>+</sup>  | 0.066 ± 0.008 | 0.041 ± 0.002 | 0.056 ± 0.002 | 0.056 ± 0.005 |

Table S3. Diffusion coefficient of [TFSI]<sup>-</sup> at 600K (nm<sup>2</sup>/ns)

| System          | noZW          | ChoPO4        | ImCO2         | ImSO3         |
|-----------------|---------------|---------------|---------------|---------------|
| Na <sup>+</sup> | 0.047 ± 0.004 | 0.041 ± 0.002 | 0.055 ± 0.006 | 0.042 ± 0.001 |
| K <sup>+</sup>  | 0.095 ± 0.004 | 0.067 ± 0.002 | 0.076 ± 0.001 | 0.077 ± 0.003 |

Table S4. Diffusion coefficients of ZW at 600K (nm<sup>2</sup>/ns)

| System          | ChoPO4        | ImCO2         | ImSO3         |
|-----------------|---------------|---------------|---------------|
| Na <sup>+</sup> | 0.007 ± 0.001 | 0.012 ± 0.002 | 0.010 ± 0.002 |
| K <sup>+</sup>  | 0.010 ± 0.001 | 0.016 ± 0.004 | 0.025 ± 0.001 |

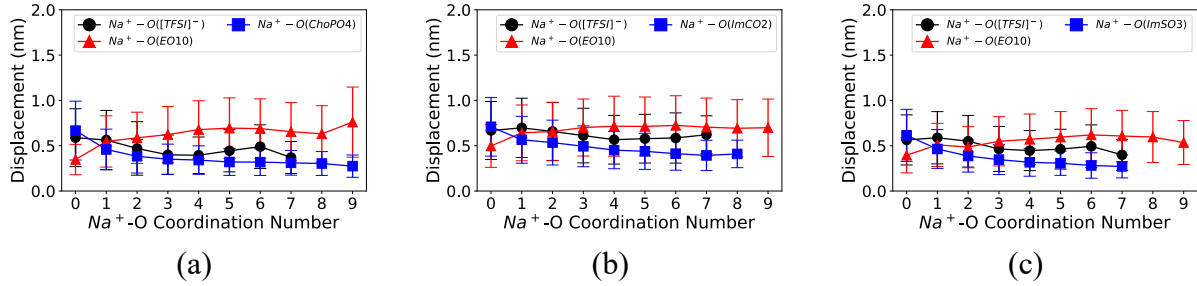

Figure S9. Distance travelled by Na<sup>+</sup> ions in a specific O coordination number over 2-ns for systems (a) with ChoPO4, (b) with ImCO2, and (c) with ImSO3.

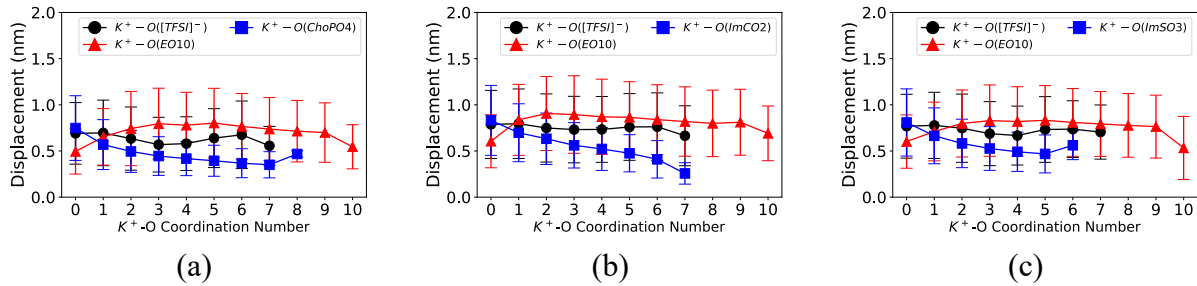

Figure S10. Distance travelled by K<sup>+</sup> ions in a specific O coordination number over 2-ns for systems (a) with ChoPO4, (b) with ImCO2, and (c) with ImSO3.

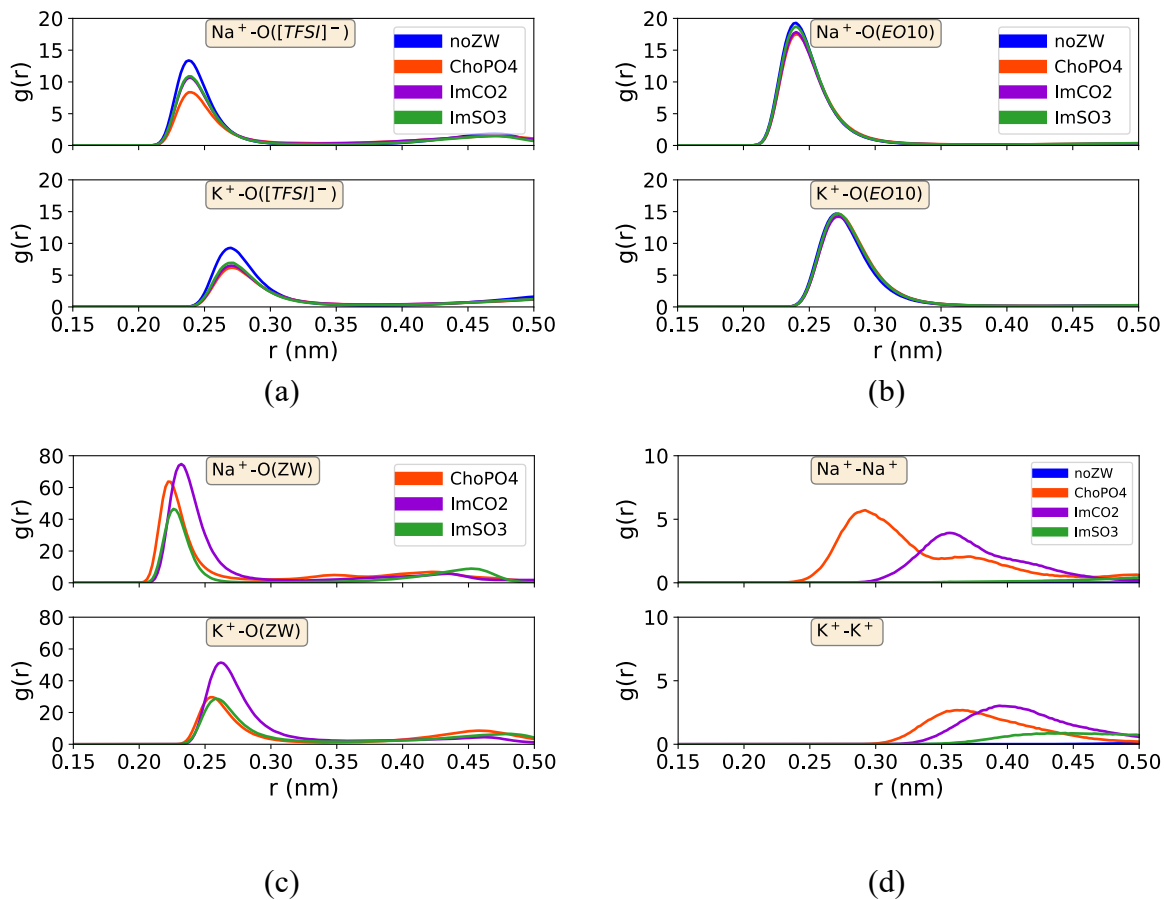

Figure S11. Radial distribution functions of (a) Na<sup>+</sup>/ K<sup>+</sup>-O([TFSI]<sup>-</sup>), (b) Na<sup>+</sup>/ K<sup>+</sup>-O(EO<sub>10</sub>), (c) Na<sup>+</sup>/ K<sup>+</sup>-O(ZW) and (d) Na<sup>+</sup>- Na<sup>+</sup> and K<sup>+</sup>-K<sup>+</sup> in NaTFSI/EO<sub>10</sub> and KTFSI/EO<sub>10</sub> systems at 353K.

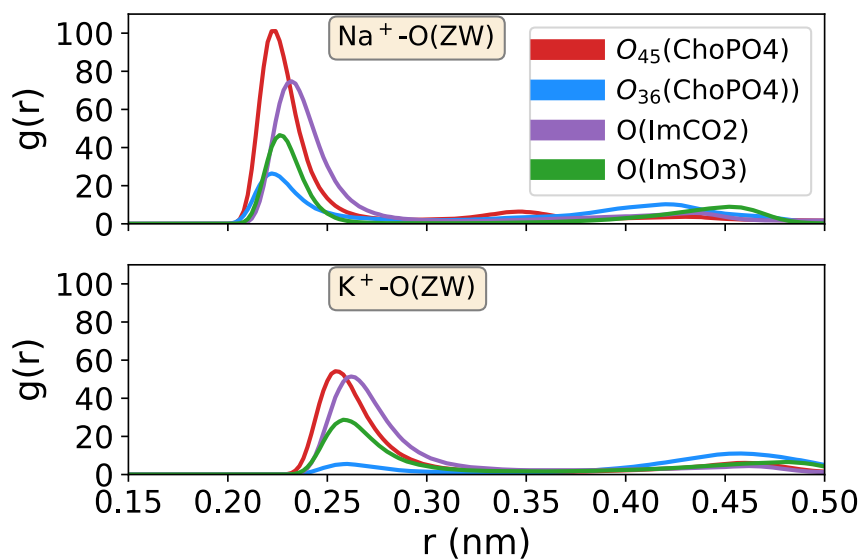



Figure S12. Radial distribution functions of cation-ZW in NaTFSI/EO<sub>10</sub> and KTFSI/EO<sub>10</sub> systems at 353K.

Table S5. Coordination numbers of Na<sup>+</sup>-O in systems at 353K

|                                          | No ZW       | ChoPO4      | ImCO2       | ImSO3       |
|------------------------------------------|-------------|-------------|-------------|-------------|
| Total                                    | 7.18 ± 0.02 | 7.02 ± 0.01 | 7.10 ± 0.01 | 6.96 ± 0.01 |
| Na <sup>+</sup> -O(ZW)                   | N/A         | 1.20 ± 0.02 | 0.93 ± 0.03 | 0.62 ± 0.05 |
| Na <sup>+</sup> -O([TFSI] <sup>-</sup> ) | 2.05 ± 0.03 | 1.43 ± 0.04 | 1.61 ± 0.03 | 1.62 ± 0.01 |
| Na <sup>+</sup> -O(EO <sub>10</sub> )    | 5.13 ± 0.05 | 4.39 ± 0.05 | 4.56 ± 0.02 | 4.72 ± 0.05 |

Table S6. Coordination numbers of K<sup>+</sup>-O in systems at 353K

|                                         | No ZW       | ChoPO4      | ImCO2       | ImSO3       |
|-----------------------------------------|-------------|-------------|-------------|-------------|
| Total                                   | 7.91 ± 0.01 | 7.83 ± 0.02 | 7.97 ± 0.01 | 7.88 ± 0.03 |
| K <sup>+</sup> -O(ZW)                   | N/A         | 1.05 ± 0.04 | 1.04 ± 0.02 | 0.86 ± 0.05 |
| K <sup>+</sup> -O([TFSI] <sup>-</sup> ) | 2.24 ± 0.01 | 1.50 ± 0.04 | 1.62 ± 0.03 | 1.63 ± 0.01 |
| K <sup>+</sup> -O(EO <sub>10</sub> )    | 5.67 ± 0.01 | 5.28 ± 0.02 | 5.31 ± 0.01 | 5.39 ± 0.03 |

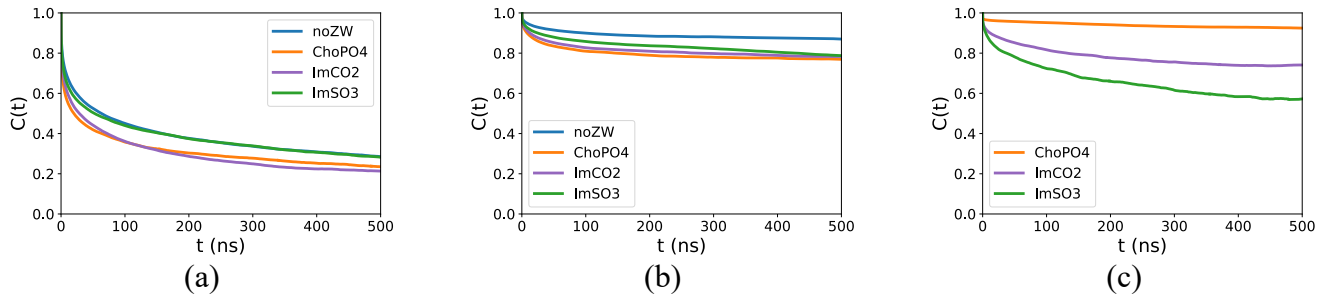

Figure S13. Residence  $C(t)$  curves of (a) Na<sup>+</sup>-O([TFSI]<sup>-</sup>) in, (b) Na<sup>+</sup>-O(EO<sub>10</sub>) and (c) Na<sup>+</sup>-O(ZW) in c systems at 353K. Colors correspond to the presence of ZW molecules.

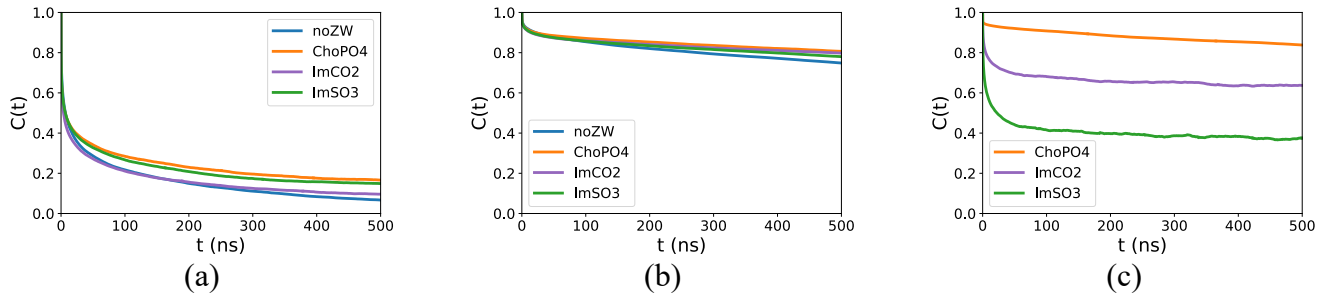

Figure S14. Residence  $C(t)$  curves of (a) K<sup>+</sup>-O([TFSI]<sup>-</sup>) in, (b) K<sup>+</sup>-O(EO<sub>10</sub>) and (c) K<sup>+</sup>-O(ZW) in c systems at 353K. Colors correspond to the presence of ZW molecules.

Table S7. Diffusion coefficient of Na<sup>+</sup>/K<sup>+</sup> at 353K (10<sup>-4</sup> nm<sup>2</sup>/ns)

| System          | noZW        | ChoPO4     | ImSO3      | ImCO2     |
|-----------------|-------------|------------|------------|-----------|
| Na <sup>+</sup> | 2.1 ± 0.2   | 1.7 ± 0.01 | 2.4 ± 0.4  | 2.8 ± 0.4 |
| K <sup>+</sup>  | 0.63 ± 0.08 | 1.6 ± 0.09 | 2.4 ± 0.05 | 1.6 ± 0.3 |

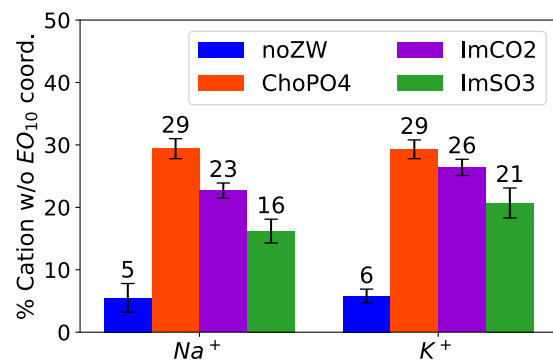

Figure S15. Percentage of cations that are not coordinating with EO<sub>10</sub> at 353K.

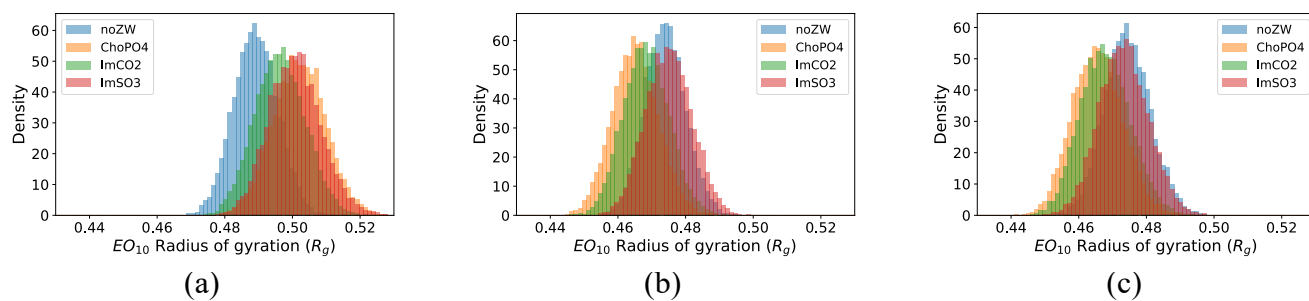

Figure S16. Rg distribution in (a) Li<sup>+</sup>, (b) Na<sup>+</sup>, (c) K<sup>+</sup> systems
